# Supplementary material for: Genetics of response to cognitive behavior therapy in adults with major depression: a preliminary report
Source: PubMed Central journal article supplement (PMC6477793; doi:10.1038/s41380-018-0289-9), 2018-11-08
Supplement: 41380_2018_289_MOESM4_ESM.pdf [file 41380_2018_289_MOESM4_ESM.pdf]

**Supplementary Figure 2.** GRS calculation. Flow chart of the SNP QC of the discovery sets, target set, and reference data, together with the overlapping numbers of SNPs among these three sets. Abbreviations: single-nucleotide polymorphism (SNP), quality control (QC), genetic risk score (GRS), genome-wide association study (GWAS), allele frequency (AF), odds ratio (OR), 1000 Genomes (IKG), major depressive disorder (MDD), bipolar disorder (BIP), attention-deficit/hyperactivity disorder (ADHD), autism spectrum disorder (ASD), intelligence (IQ), educational attainment (EDU)
